# Supplementary material for: The Phenotype of the Adipocytes Derived from Subcutaneous and Visceral ADMSCs Is Altered When They Originate from Morbidly Obese Women: Is There a Memory Effect?
Source: MDPI journal article supplement (doi:10.3390/cells11091435), 2022-04-23
Supplement: s1 [file s1]

## Supplementary Materials:

**Figure S1.** Gating strategy for the determination of the size and granularity of ADMSC-derived adipocytes by flow cytometry. Numbers indicate ranges used to classify the cells to different groups based on the cell size (I: 0-275, II: 275-550, III: 550-825, IV: 825-1100) or granularity (I: 0-250, II: 250-500, III: 500-750, IV: 750-1100).

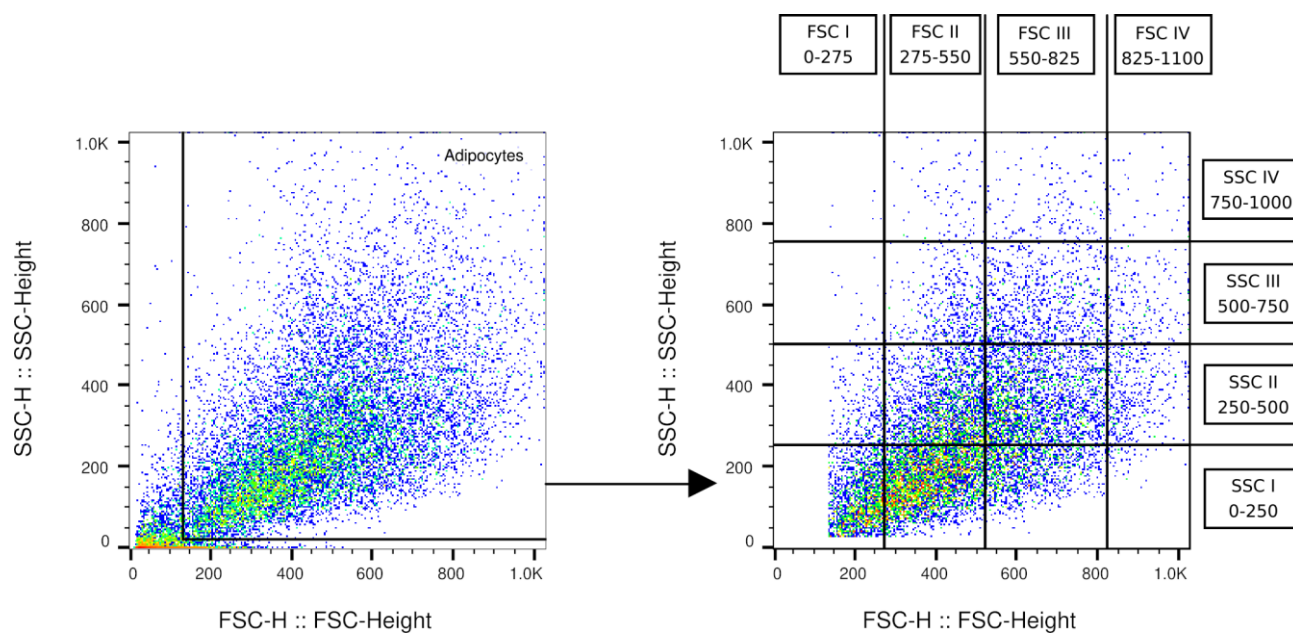

**Table S1.** The primers used for real-time PCR.

| Target gene       | Forward primer (5'-3')   | Reverse primer (5'-3')  | Amplicon product size (bp) |
|-------------------|--------------------------|-------------------------|----------------------------|
| <b>TBC1D1</b>     | GTGTGGGAAAAGATGCTTAGCA   | GTGATGACGTGGCACACCTT    | 99                         |
| <b>TBC1D4</b>     | AGCTCCAGTGAACAGTGCAGTG   | CACTTAGGGACTCATTGCTGC   | 76                         |
| <b>CD36/SR-B2</b> | GGTACAGATGCAGCCTCATT     | AGGCCTTGGATGGAAGAACA    | 157                        |
| <b>FATP1</b>      | GCTAAGGCCCTGATCTTTGG     | CCAAGTCTCCAGAGCAGAAC    | 100                        |
| <b>FATP4</b>      | TGGCGCTTCATCCGGGTCTT     | CGAACGGTAGAGGCAAACAA    | 140                        |
| <b>FABPpm</b>     | GAAGGCAAAGGTGCGACAGT     | GCCGAACGGTAGAGGCAAA     | 71                         |
| <b>RPLO13A</b>    | CTATGACCAATAGGAAGAGCAACC | GCAGAGTATATGACCAGGTGGAA | 121                        |

**Table S2.** Clinical characteristics of patients (tissue donors).

|                                 | <b>Lean</b>    | <b>Obese(-)</b>  | <b>Obese(+)</b>  |
|---------------------------------|----------------|------------------|------------------|
| <b>Age [years]</b>              | 58.0 ± 3.367   | 58.25 ± 2.63     | 59.0 ± 3.162     |
| <b>BMI [kg/m<sup>2</sup>]</b>   | 24.85 ± 3.104  | 42.38 ± 2.416 a  | 50.19 ± 4.509 ab |
| <b>Waist circumference [cm]</b> | 77.5 ± 7.0     | 117.5 ± 4.041 a  | 139.5 ± 17.02 a  |
| <b>WHR</b>                      | 0.84 ± 0.138   | 0.92 ± 0.028     | 0.93 ± 0.026     |
| <b>CRP [mg/L]</b>               | 5.48 ± 0.435   | 9.19 ± 0.848 a   | 12.28 ± 2.457 a  |
| <b>Glucose [mg/dL]</b>          | 72.75 ± 2.217  | 99.75 ± 12.894 a | 104.5 ± 11.733 a |
| <b>Insulin [uIU/mL]</b>         | 7.62 ± 0.672   | 20.52 ± 2.622 a  | 28.14 ± 7.148 a  |
| <b>HOMA-IR</b>                  | 1.37 ± 0.085   | 5.04 ± 0.812 a   | 7.35 ± 2.415 a   |
| <b>ALT [IU/L]</b>               | 24.5 ± 4.041   | 36.75 ± 6.344 a  | 29.25 ± 1.893    |
| <b>AST [IU/L]</b>               | 23.0 ± 2.0     | 20.5 ± 3.697     | 34.25 ± 8.221 b  |
| <b>Chol [mg/dL]</b>             | 170.75 ± 6.702 | 171.25 ± 11.529  | 207.25 ± 57.996  |
| <b>LDL [mg/dL]</b>              | 114.75 ± 1.5   | 123.5 ± 9.147    | 140.25 ± 35.929  |
| <b>TAG [mg/dL]</b>              | 138.5 ± 4.655  | 145.5 ± 6.455    | 171.0 ± 19.201 a |
| <b>HDL [mg/dL]</b>              | 60.25 ± 6.238  | 50.25 ± 4.272 a  | 38.0 ± 12.41 a   |
| <b>WBC [10<sup>3</sup>/μL]</b>  | 7.76 ± 0.668   | 8.4 ± 1.962      | 7.95 ± 1.666     |
| <b>RBC [10<sup>3</sup>/μL]</b>  | 4.81 ± 0.149   | 4.66 ± 0.405     | 4.95 ± 0.285     |
| <b>HGB [g/dL]</b>               | 14.9 ± 0.849   | 14.1 ± 0.913     | 13.68 ± 0.793    |
| <b>PLT [10<sup>3</sup>/μL]</b>  | 287.5 ± 11.902 | 289.25 ± 50.129  | 308.75 ± 23.128  |
| <b>Fibrynogen [mg/dL]</b>       | 379.5 ± 9.0    | 404.0 ± 19.9     | 429.75 ± 9.106 a |
| <b>SP [mmHg]</b>                | 126.25 ± 9.465 | 128.75 ± 11.087  | 143.75 ± 9.465 a |
| <b>DP [mmHg]</b>                | 80.0 ± 4.082   | 86.25 ± 4.787    | 95.0 ± 4.082 ab  |

Data are presented as mean ± SD.

p < 0.05; a – indicate significant differences from lean subjects; b – indicate significant differences from Obese(-) group.

ALT – alanine transaminase; AST – asparatate transaminase; BMI – body mass index; Chol – cholesterol; CRP – C-reactive protein; DP – diastolic pressure; HDL – high density lipoprotein; HGB – hemoglobin; HOMA-IR – homeostatic model assessment of insulin resistance; INR – international normalized ratio; LDL – low-density

lipoprotein; PLT – platelet count; RBC – red blood cell count; SP – systolic pressure; TAG – triacylglycerol; WBC – white blood cell count; WHR – waist-hip ratio.

**Table S3.** FFA—Fatty acid composition (nmol/mg of protein).

|                                       | subLean       | subObese(-)    | subObese(+)     | visLean        | visObese(-)    | visObese(+)      |
|---------------------------------------|---------------|----------------|-----------------|----------------|----------------|------------------|
| <b>Myristic acid (14:0)</b>           | 1.85 ± 0.868  | 3.7 ± 0.546 a  | 4.4 ± 2.157     | 2.37 ± 0.623   | 2.32 ± 0.536 c | 2.37 ± 0.966     |
| <b>Palmitic acid (16:0)</b>           | 17.49 ± 2.708 | 18.27 ± 4.952  | 26.6 ± 4.661 a  | 15.43 ± 4.469  | 16.92 ± 8.007  | 12.94 ± 4.687 c  |
| <b>Palmitooleic acid (16:1)</b>       | 5.94 ± 0.468  | 6.59 ± 0.856   | 11.17 ± 5.651   | 4.6 ± 1.565    | 4.81 ± 1.46    | 1.65 ± 0.956 abc |
| <b>Stearic acid (18:0)</b>            | 7.14 ± 1.647  | 5.48 ± 1.903   | 6.5 ± 1.399     | 5.58 ± 2.109   | 6.91 ± 4.49    | 4.43 ± 1.232     |
| <b>Oleic acid (18:1n9c)</b>           | 3.12 ± 0.738  | 2.76 ± 0.801   | 4.19 ± 2.059    | 1.88 ± 0.315 c | 1.74 ± 0.365   | 1.23 ± 0.564     |
| <b>Linoleic acid (18:2n6c)</b>        | 0.2 ± 0.183   | 0.14 ± 0.085   | 0.14 ± 0.015    | 0.13 ± 0.03    | 0.22 ± 0.065   | 0.15 ± 0.021     |
| <b>Arachidic acid (20:0)</b>          | 0.16 ± 0.114  | 0.13 ± 0.055   | 0.12 ± 0.006    | 0.12 ± 0.023   | 0.15 ± 0.05    | 0.09 ± 0.018     |
| <b>Linolenic acid (C18:9n3)</b>       | 0.18 ± 0.119  | 0.16 ± 0.08    | 0.11 ± 0.022    | 0.13 ± 0.024   | 0.19 ± 0.099   | 0.12 ± 0.026     |
| <b>Behenic acid (22:0)</b>            | 0.12 ± 0.13   | 0.1 ± 0.053    | 0.07 ± 0.03     | 0.1 ± 0.017    | 0.11 ± 0.079   | 0.05 ± 0.008 a   |
| <b>Arachidonic acid (20:4n6)</b>      | 0.23 ± 0.11   | 0.13 ± 0.078   | 0.17 ± 0.018    | 0.26 ± 0.039   | 0.19 ± 0.116   | 0.12 ± 0.027 ac  |
| <b>Lignoceric acid (24:0)</b>         | 0.42 ± 0.26   | 0.15 ± 0.039 a | 0.22 ± 0.111    | 0.44 ± 0.194   | 0.3 ± 0.141    | 0.19 ± 0.095     |
| <b>Eicosapentaenoic acid (20:5n3)</b> | 0.14 ± 0.067  | 0.47 ± 0.765   | 0.16 ± 0.075    | 0.07 ± 0.017   | 0.2 ± 0.127    | 0.12 ± 0.064     |
| <b>Nervonic acid (24:1)</b>           | 0.09 ± 0.087  | 0.06 ± 0.026   | 0.04 ± 0.009    | 0.05 ± 0.008   | 0.06 ± 0.044   | 0.04 ± 0.009     |
| <b>Docosahexaenoic acid (22:6n3)</b>  | 0.11 ± 0.069  | 0.09 ± 0.042   | 0.07 ± 0.009    | 0.09 ± 0.012   | 0.14 ± 0.065   | 0.08 ± 0.024     |
| <b>Saturated</b>                      | 27.18 ± 3.945 | 27.83 ± 7.002  | 37.9 ± 3.591 a  | 24.04 ± 6.82   | 26.72 ± 12.369 | 20.07 ± 6.899 c  |
| <b>Unsaturated</b>                    | 10.01 ± 0.44  | 10.39 ± 2.18   | 16.06 ± 7.723   | 7.21 ± 1.761 c | 7.55 ± 1.979   | 3.52 ± 1.49 abc  |
| <b>MUFA</b>                           | 9.15 ± 0.267  | 9.41 ± 1.321   | 15.4 ± 7.667    | 6.53 ± 1.715   | 6.61 ± 1.803   | 2.93 ± 1.515 abc |
| <b>PUFA</b>                           | 0.86 ± 0.542  | 0.98 ± 0.946   | 0.66 ± 0.06     | 0.68 ± 0.074   | 0.93 ± 0.372   | 0.59 ± 0.027     |
| <b>Total</b>                          | 37.19 ± 4.323 | 38.22 ± 7.762  | 53.96 ± 10.07 a | 31.26 ± 5.15   | 34.27 ± 10.864 | 23.58 ± 8.355 c  |

a – difference vs. Lean group in the studied tissue; b – difference vs. Obese(-) group in the studied tissue; c – difference between adipocytes differentiated from visADMSCs vs. subADMSCs within the patient donor metabolic status. Data are presented as mean ± SD (n=4 for each study group, measurements taken in triplicate). P < 0.05. Designation of the groups: Obese(-) – obese without metabolic syndrome patients; Obese(+) – obese with metabolic syndrome patients.

**Table S4.** DAG—Fatty acid composition (nmol/mg of protein).

|                                       | subLean       | subObese(-)    | subObese(+)      | visLean        | visObese(-)     | visObese(+)      |
|---------------------------------------|---------------|----------------|------------------|----------------|-----------------|------------------|
| <b>Myristic acid (14:0)</b>           | 4.75 ± 0.614  | 4.88 ± 1.407   | 7.89 ± 1.78 ab   | 6.87 ± 1.916   | 6.22 ± 1.138    | 5.21 ± 2.028     |
| <b>Palmitic acid (16:0)</b>           | 19.81 ± 3.129 | 23.17 ± 6.66   | 31.59 ± 7.534 a  | 23.68 ± 6.945  | 22.86 ± 5.498   | 19.74 ± 12.48    |
| <b>Palmitoleic acid (16:1)</b>        | 10.98 ± 1.508 | 14.07 ± 1.69   | 17.87 ± 7.299    | 9.86 ± 7.645   | 9.57 ± 2.785 c  | 3.38 ± 2.29 c    |
| <b>Stearic acid (18:0)</b>            | 4.11 ± 2.327  | 5.99 ± 3.413   | 10.99 ± 10.569   | 4.93 ± 2.104   | 7.16 ± 3.699    | 7.81 ± 4.914     |
| <b>Oleic acid (18:1n9c)</b>           | 5.13 ± 0.812  | 6.55 ± 1.527   | 7.07 ± 2.314     | 5.24 ± 2.304   | 4.31 ± 0.468    | 2.79 ± 1.786 c   |
| <b>Linoleic acid (18:2n6c)</b>        | 0.22 ± 0.102  | 0.31 ± 0.184   | 0.39 ± 0.067 a   | 0.42 ± 0.236   | 0.49 ± 0.092    | 0.39 ± 0.152     |
| <b>Arachidic acid (20:0)</b>          | 0.19 ± 0.072  | 0.2 ± 0.099    | 0.22 ± 0.056     | 0.2 ± 0.065    | 0.28 ± 0.067    | 0.26 ± 0.118     |
| <b>Linolenic acid (C18:9n3)</b>       | 0.16 ± 0.05   | 0.27 ± 0.118   | 0.24 ± 0.021     | 0.18 ± 0.103   | 0.27 ± 0.086    | 0.24 ± 0.083     |
| <b>Behenic acid (22:0)</b>            | 0.12 ± 0.014  | 0.15 ± 0.073   | 0.16 ± 0.063     | 0.18 ± 0.071   | 0.16 ± 0.075    | 0.17 ± 0.082     |
| <b>Arachidonic acid (20:4n6)</b>      | 0.7 ± 0.322   | 0.53 ± 0.31    | 0.61 ± 0.418     | 0.87 ± 0.31    | 0.58 ± 0.388    | 0.52 ± 0.141 a   |
| <b>Lignoceric acid (24:0)</b>         | 0.28 ± 0.095  | 0.23 ± 0.052   | 0.23 ± 0.124     | 0.48 ± 0.189   | 0.37 ± 0.149    | 0.35 ± 0.161     |
| <b>Eicosapentaenoic acid (20:5n3)</b> | 0.11 ± 0.055  | 0.26 ± 0.279   | 0.22 ± 0.096     | 0.16 ± 0.019   | 0.3 ± 0.158     | 0.22 ± 0.077     |
| <b>Nervonic acid (24:1)</b>           | 0.07 ± 0.038  | 0.08 ± 0.037   | 0.07 ± 0.015     | 0.1 ± 0.045    | 0.11 ± 0.074    | 0.12 ± 0.083     |
| <b>Docosahexaenoic acid (22:6n3)</b>  | 0.08 ± 0.044  | 0.14 ± 0.078   | 0.14 ± 0.025     | 0.16 ± 0.026 c | 0.25 ± 0.071    | 0.21 ± 0.074     |
| <b>Saturated</b>                      | 29.24 ± 5.621 | 34.61 ± 10.476 | 51.08 ± 17.214   | 36.35 ± 8.652  | 37.05 ± 7.98    | 33.55 ± 17.871   |
| <b>Unsaturated</b>                    | 17.47 ± 2.076 | 22.21 ± 3.236  | 26.61 ± 9.549    | 17.0 ± 9.834   | 15.88 ± 3.355 c | 7.87 ± 4.04 bc   |
| <b>MUFA</b>                           | 16.19 ± 2.202 | 20.7 ± 2.979   | 25.01 ± 9.199    | 15.2 ± 9.885   | 14.0 ± 3.082 c  | 6.3 ± 4.028 b    |
| <b>PUFA</b>                           | 1.28 ± 0.16   | 1.51 ± 0.829   | 1.6 ± 0.564      | 1.8 ± 0.268 c  | 1.88 ± 0.544    | 1.58 ± 0.451     |
| <b>Total</b>                          | 46.71 ± 4.51  | 56.82 ± 12.02  | 77.68 ± 7.932 ab | 53.34 ± 15.555 | 52.94 ± 5.007   | 41.42 ± 21.817 c |

a – difference vs. Lean group in the studied tissue; b – difference vs. Obese(-) group in the studied tissue; c – difference between adipocytes differentiated from visADMSCs vs. subADMSCs within the patient donor metabolic status. Data are presented as mean ± SD (n=4 for each study group, measurements taken in triplicate). P < 0.05. Designation of the groups: Obese(-) – obese without metabolic syndrome patients; Obese(+) – obese with metabolic syndrome patients.

**Table S5.** TAG—Fatty acid composition (nmol/mg of protein).

|                                       | subLean           | subObese(-)        | subObese(+)         | visLean            | visObese(-)       | visObese(+)          |
|---------------------------------------|-------------------|--------------------|---------------------|--------------------|-------------------|----------------------|
| <b>Myristic acid (14:0)</b>           | 296.95 ± 118.385  | 279.89 ± 105.482   | 405.53 ± 35.818     | 141.82 ± 70.563    | 176.43 ± 54.541   | 105.96 ± 54.966 c    |
| <b>Palmitic acid (16:0)</b>           | 1136.74 ± 280.446 | 905.26 ± 447.232   | 1597.02 ± 260.068 b | 534.39 ± 304.508 c | 769.51 ± 178.888  | 473.76 ± 144.096 bc  |
| <b>Palmitoleic acid (16:1)</b>        | 1149.78 ± 278.541 | 893.83 ± 402.716   | 1518.93 ± 329.644   | 476.04 ± 330.707   | 645.3 ± 87.783    | 326.88 ± 163.308 bc  |
| <b>Stearic acid (18:0)</b>            | 40.69 ± 23.224    | 45.91 ± 35.277     | 55.97 ± 28.863      | 21.42 ± 5.789      | 18.87 ± 6.33      | 23.95 ± 5.48         |
| <b>Oleic acid (18:1n9c)</b>           | 752.18 ± 243.702  | 530.68 ± 249.722   | 788.92 ± 67.238     | 252.16 ± 116.216 c | 286.23 ± 41.702   | 199.35 ± 86.299 c    |
| <b>Linoleic acid (18:2n6c)</b>        | 4.95 ± 0.706      | 4.65 ± 2.373       | 6.42 ± 1.519        | 2.16 ± 0.377 c     | 3.94 ± 1.5        | 2.85 ± 1.661 c       |
| <b>Arachidic acid (20:0)</b>          | 0.9 ± 0.192       | 0.98 ± 0.492       | 1.48 ± 0.341 a      | 0.66 ± 0.174       | 0.73 ± 0.218      | 0.79 ± 0.33 c        |
| <b>Linolenic acid (C18:9n3)</b>       | 11.49 ± 1.193     | 9.96 ± 2.986       | 15.36 ± 3.632       | 5.44 ± 1.73 c      | 7.97 ± 1.366      | 6.17 ± 0.879 c       |
| <b>Behenic acid (22:0)</b>            | 4.49 ± 7.471      | 4.09 ± 3.934       | 6.39 ± 3.357        | 1.63 ± 2.16        | 4.12 ± 2.519      | 3.72 ± 2.656         |
| <b>Arachidonic acid (20:4n6)</b>      | 5.27 ± 1.522      | 4.95 ± 1.806       | 5.51 ± 1.494        | 3.62 ± 0.571       | 4.56 ± 0.703      | 3.16 ± 1.24          |
| <b>Lignoceric acid (24:0)</b>         | 1.18 ± 0.79       | 1.12 ± 1.114       | 0.72 ± 0.4          | 0.72 ± 0.406       | 1.07 ± 1.014      | 1.16 ± 1.558         |
| <b>Eicosapentaenoic acid (20:5n3)</b> | 3.47 ± 1.253      | 1.08 ± 1.188       | 1.94 ± 2.048        | 2.22 ± 1.117       | 0.59 ± 0.191      | 1.83 ± 1.683         |
| <b>Nervonic acid (24:1)</b>           | 0.72 ± 0.232      | 0.65 ± 0.362       | 0.76 ± 0.257        | 0.33 ± 0.028 c     | 0.65 ± 0.212 a    | 0.87 ± 0.633 a       |
| <b>Docosahexaenoic acid (22:6n3)</b>  | 3.92 ± 1.234      | 5.28 ± 2.142       | 4.83 ± 2.352        | 4.1 ± 1.536        | 6.04 ± 2.778      | 6.53 ± 3.231         |
| <b>Saturated</b>                      | 1480.95 ± 369.956 | 1237.25 ± 581.334  | 2067.11 ± 282.823 a | 700.63 ± 364.874 c | 970.72 ± 230.722  | 609.34 ± 196.875 c   |
| <b>Unsaturated</b>                    | 1931.76 ± 239.881 | 1451.08 ± 632.778  | 2342.67 ± 348.505   | 746.07 ± 445.475 c | 955.29 ± 130.694  | 547.63 ± 252.659 bc  |
| <b>MUFA</b>                           | 1902.67 ± 238.386 | 1425.16 ± 628.189  | 2308.6 ± 346.469    | 728.52 ± 446.652 c | 932.18 ± 129.041  | 527.1 ± 247.998 c    |
| <b>PUFA</b>                           | 28.37 ± 3.588     | 25.85 ± 7.417      | 34.43 ± 4.78        | 17.82 ± 2.035 c    | 23.2 ± 4.307      | 20.3 ± 5.097 c       |
| <b>Total</b>                          | 3412.72 ± 465.64  | 2688.33 ± 1194.037 | 4409.78 ± 598.482 a | 1446.7 ± 806.721 c | 1926.01 ± 325.215 | 1156.97 ± 446.993 bc |

a – difference vs. Lean group in the studied tissue; b – difference vs. Obese(-) group in the studied tissue; c – difference between adipocytes differentiated from visADMSCs vs. subADMSCs within the patient donor metabolic status. Data are presented as mean ± SD (n=4 for each study group, measurements taken in triplicate).

P < 0.05. Designation of the groups: Obese(-) – obese without metabolic syndrome patients; Obese(+) – obese with metabolic syndrome patients.

Table S6. Summary table of ANOVA analysis.

| Three-way ANOVA                      |                     |         |
|--------------------------------------|---------------------|---------|
| TBC1D1 mRNA                          |                     |         |
| Source of variation                  | % of total variance | p value |
| tissue                               | 0.8                 | 0.7     |
| obesity                              | 0.1                 | 0.9     |
| metabolic syndrome                   | 1.2                 | 0.63    |
| residual                             | 98                  |         |
| Three-way ANOVA                      |                     |         |
| TBC1D4/AS160 mRNA                    |                     |         |
| Source of variation                  | % of total variance | p value |
| tissue                               | 25.2                | < 0.01  |
| obesity                              | 35.2                | < 0.01  |
| metabolic syndrome                   | 1.4                 | 0.4     |
| residual                             | 38.2                |         |
| Three-way ANOVA                      |                     |         |
| TBC1D1 protein                       |                     |         |
| Source of variation                  | % of total variance | p value |
| tissue                               | 82                  | < 0.01  |
| obesity                              | 0.2                 | 0.83    |
| metabolic syndrome                   | 16.8                | 0.08    |
| residual                             | 0.9                 |         |
| Three-way ANOVA                      |                     |         |
| TBC1D4/AS160 protein                 |                     |         |
| Source of variation                  | % of total variance | p value |
| tissue                               | 43                  | < 0.01  |
| obesity                              | 29.6                | < 0.01  |
| metabolic syndrome                   | 1.4                 | 0.31    |
| residual                             | 26.1                |         |
| Three-way ANOVA                      |                     |         |
| palmitate uptake [dpm/mg of protein] |                     |         |
| Source of variation                  | % of total variance | p value |
| tissue                               | 15.7                | < 0.01  |
| obesity                              | 13.4                | 0.01    |

|                     |                     |         |
|---------------------|---------------------|---------|
| metabolic syndrome  | 37.6                | < 0.01  |
| residual            | 33.3                |         |
| Three-way ANOVA     |                     |         |
| FAT/CD36 mRNA       |                     |         |
| Source of variation | % of total variance | p value |
| tissue              | 4.8                 | 0.18    |
| obesity             | 0.5                 | 0.65    |
| metabolic syndrome  | 45.1                | < 0.01  |
| residual            | 49.6                |         |
| Three-way ANOVA     |                     |         |
| FABPpm mRNA         |                     |         |
| Source of variation | % of total variance | p value |
| tissue              | 31.7                | < 0.01  |
| obesity             | 1.8                 | 0.47    |
| metabolic syndrome  | 0.3                 | 0.78    |
| residual            | 66.2                |         |
| Three-way ANOVA     |                     |         |
| FATP1 mRNA          |                     |         |
| Source of variation | % of total variance | p value |
| tissue              | 9.7                 | 0.15    |
| obesity             | 1.6                 | 0.55    |
| metabolic syndrome  | 0.7                 | 0.69    |
| residual            | 88                  |         |
| Three-way ANOVA     |                     |         |
| FATP4 mRNA          |                     |         |
| Source of variation | % of total variance | p value |
| tissue              | 21.3                | 0.02    |
| obesity             | 8.1                 | 0.13    |
| metabolic syndrome  | 4.5                 | 0.26    |
| residual            | 66.1                |         |
| Three-way ANOVA     |                     |         |
| FAT/CD36 protein    |                     |         |
| Source of variation | % of total variance | p value |
| tissue              | 68.4                | < 0.01  |
| obesity             | 9.4                 | < 0.01  |
| metabolic syndrome  | 6.4                 | 0.01    |
| residual            | 15.8                |         |

| Three-way ANOVA     |                     |         |
|---------------------|---------------------|---------|
| FABPpm protein      |                     |         |
| Source of variation | % of total variance | p value |
| tissue              | 42.1                | 0.2     |
| obesity             | 12.6                | 0.48    |
| metabolic syndrome  | 8                   | 0.568   |
| residual            | 37.3                |         |
| Three-way ANOVA     |                     |         |
| FATP1 protein       |                     |         |
| Source of variation | % of total variance | p value |
| tissue              | 1.3                 | 0.48    |
| obesity             | 44.1                | < 0.01  |
| metabolic syndrome  | 1.5                 | 0.46    |
| residual            | 53                  |         |
| Three-way ANOVA     |                     |         |
| FATP4 protein       |                     |         |
| Source of variation | % of total variance | p value |
| tissue              | 1.4                 | 0.54    |
| obesity             | 20.4                | 0.03    |
| metabolic syndrome  | 4.9                 | 0.26    |
| residual            | 73.3                |         |
| Three-way ANOVA     |                     |         |
| FFA (total)         |                     |         |
| Source of variation | % of total variance | p value |
| tissue              | 33.6                | < 0.01  |
| obesity             | 1.8                 | 0.46    |
| metabolic syndrome  | 0.8                 | 0.62    |
| residual            | 63.8                |         |
| Three-way ANOVA     |                     |         |
| DAG (total)         |                     |         |
| Source of variation | % of total variance | p value |
| tissue              | 12.4                | 0.1     |
| obesity             | 4.6                 | 0.3     |
| metabolic syndrome  | 1.4                 | 0.56    |
| residual            | 81.5                |         |
| Three-way ANOVA     |                     |         |
| TAG (total)         |                     |         |



| Source of variation  | % of total variance | p value |
|----------------------|---------------------|---------|
| tissue               | 59.8                | < 0.01  |
| obesity              | 0.2                 | 0.76    |
| metabolic syndrome   | 2.3                 | 0.29    |
| residual             | 37.8                |         |
| Four-way ANOVA       |                     |         |
| ROS [mg/mL]          |                     |         |
| Source of variation  | % of total variance | p value |
| tissue               | 3.9                 | < 0.01  |
| obesity              | 2.7                 | 0.03    |
| metabolic syndrome   | 0.1                 | 0.62    |
| differentiation      | 71.5                | < 0.01  |
| residual             | 21.8                |         |
| Three-way ANOVA      |                     |         |
| FASN protein         |                     |         |
| Source of variation  | % of total variance | p value |
| tissue               | 55.4                | < 0.01  |
| obesity              | 23.2                | < 0.01  |
| metabolic syndrome   | 0                   | 0.86    |
| residual             | 21.4                |         |
| Three-way ANOVA      |                     |         |
| DGAT1 protein        |                     |         |
| Source of variation  | % of total variance | p value |
| tissue               | 64.9                | < 0.01  |
| obesity              | 20.9                | < 0.01  |
| metabolic syndrome   | 2                   | 0.09    |
| residual             | 12.2                |         |
| Three-way ANOVA      |                     |         |
| $\beta$ -HAD protein |                     |         |
| Source of variation  | % of total variance | p value |
| tissue               | 29.2                | < 0.01  |
| obesity              | 25.6                | < 0.01  |
| metabolic syndrome   | 15.4                | < 0.01  |
| residual             | 29.8                |         |
| Three-way ANOVA      |                     |         |
| ATGL                 |                     |         |
| Source of variation  | % of total variance | p value |

|                    |      |        |
|--------------------|------|--------|
| tissue             | 62.6 | < 0.01 |
| obesity            | 0.1  | 0.77   |
| metabolic syndrome | 2.7  | 0.23   |
| residual           | 34.6 |        |
